# Supplementary material for: Performance evaluation of an integrated path differential absorption LIDAR model for surface pressure from low-Earth orbit
Source: Copernicus journal article supplement (doi:10.5194/amt-2022-69), 2022-04-25
Supplement: Supplementary file [file amt-2022-69-RC1-supplement.pdf]

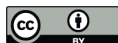

# 1 Performance evaluation of an integrated path 2 differential absorption LIDAR model for surface 3 pressure from low-Earth orbit

4 Guanglie Hong<sup>1</sup>, Yu Dong<sup>2</sup>, Huige Di<sup>2</sup>

5  
6 <sup>1</sup>Shanghai Institute of Technical Physics, Chinese Academy of Sciences, Shanghai, 200083,  
7 China

8 <sup>2</sup>Xi'an University of Technology, Xi'an, 710048, China

9 *Correspondence to:* Dong Yu (dy\_raister@163.com), Di Huige (dihuige@xaut.edu.cn)

10 **Abstract.** Remote sensing of surface pressure from space is critical; differential absorption  
11 LIDAR and differential absorption radar are only two kinds of remote sensing instruments  
12 with this potential. The differential absorption LIDAR works in integral path mode from the  
13 satellite in low-Earth orbit. It measures the differential optical depth of the Oxygen A-band,  
14 and the surface pressure is thereafter obtained by performing circle-iterative calculation.  
15 Performance evaluation of the differential absorption LIDAR model was conducted with  
16 respect to the advanced system parameters of the space instrument, Low echo pulse energy at  
17 ocean surface and the challenging calculation of repetitive cumulative average of echo on  
18 uneven land surface yielded random errors in surface pressure measurement. On the other  
19 hand, uncertain atmospheric temperature and water vapor mixture profiles resulted in  
20 systematic error of surface pressure. Consequently, controlling the error of surface pressure  
21 within 0.1% proved challenging. Under a strict implementation of the error budget, the time  
22 resolution is 6.25 s and along-orbit distance resolution is 44km, and the results showed that  
23 765.6735/765.4637 nm is suitable as the working wavelength pair. Further, error could be  
24 expected to within 0.2–0.3% for the cumulative average of 625 ocean surface laser pulse  
25 echoes, cumulative average of more than 144 pulse echoes on land, and observation from the  
26 400km orbit.

## 27 1 Introduction

28 Atmospheric pressure plays a vital role in several atmospheric processes related to  
29 atmospheric dynamics. Low/high pressure, low pressure troughs, high pressure ridges, and  
30 anticyclones and other related information have been introduced into the atmospheric model.  
31 Hurricanes are profound low-pressure systems that originate from low-pressure cyclones in  
32 the tropical or subtropical oceanic regions. Accurate prediction of their formation, landing  
33 direction, and movement trajectory requires atmospheric pressure gradient distribution data.  
34 Fundamentally, the density of the atmosphere in high latitudes increase during winter, causing  
35 the air to shrink and sink, thereby increasing the pressure and gradually resulting in the  
36 formation of a powerful, deep, and broad air mass. Upon the accumulation of a sufficient cold  
37 high-pressure force, a cold wave is formed, which rolls out and pours down. Meanwhile,  
38 airspace for the release of radio sounding balloons is restricted; thus, continuous detection  
39 during the entire day is not possible. Brown et al.(1986) reported that the accuracy of the  
40 weather models is primarily limited by the regional sparsity of the input data. Specifically,  
41 atmospheric pressure data is very sparse in large areas of the ocean, desert, plateaus, and polar  
42 regions. Consequently, the International Meteorological Organization aims to achieve remote  
43 sensing of surface pressure at an accuracy of 0.1–0.3%(Korb et al., 1995)(WMO-ICSU, 1973),  
44 which however, remains a big challenge.



45 In 1983, Korb, C. L. et al., (1983) of Laboratory for Atmospheres, NASA Goddard Space  
46 Flight Center, proposed a method of detecting atmospheric pressure using differential  
47 absorption LIDAR and the trough between oxygen absorption lines. In 1987, Schwemmer et  
48 al. (1987) structured a novel differential absorption LIDAR system. It employs a flash-pump  
49 alexandrite laser to emit a beam of two wavelengths of approximately  $13160\text{cm}^{-1}$ , coupled with  
50 an oxygen photoacoustic absorption cell and a high-precision wavelength meter to stabilize  
51 the emission wavelength. Moreover, the seed source is a continuous wave from either a  
52 Ti:sapphire single longitudinal mode laser or a diode laser (Schwemmer et al., 1987). In June  
53 and July 1989, a series of flight measurement tests were conducted on the east coast of the  
54 United States (Korb et al., 1989). In 1999, Flamant, C. N., Schwemmer, G. K., Korb, C. L.,  
55 Evans, K. D. and Palm, S. P. published their report "Pressure measurements Using and  
56 Airborne Differential absorption LIDAR. Part I: Analysis of the systematic error  
57 sources," (Flamant et al., 1999) where in the instrumental and systematic error sources of  
58 differential absorption LIDAR was analyzed when measuring atmospheric pressure profile.

59 In the ASCENDS (Active Sensing of CO<sub>2</sub> Emission over Nights, Days, and Seasons)  
60 program, the surface pressure was determined to accurately measure the CO<sub>2</sub> dry mixing  
61 ratio (Zaccheo et al., 2014; Crowell, et al., 2015). Between 2007 and 2013 Stephen, M.  
62 Krainak, M. Riris, H. and others of NASA Goddard Space Flight Center and Allan, G. R. of  
63 Sigma Space Corporation reported on the use of an aircraft as a platform and transmitter to  
64 continuously send out pulse trains of multiple wavelengths of approximately 764.7nm with  
65 the receiver receiving the return echoes. (Stephen et al., 2007-2008; Riris et al., 2012-  
66 2013, 2017) Thus, multiple pulse train return signals were accumulated, using which the  
67 oxygen absorption spectrum curve of the 764.5–764.9nm trough segment was plotted.  
68 Subsequently, the differential optical depth of oxygen was calculated from the transmittance  
69 curve.

70 Dual-wavelength (detection/reference wavelengths) laser pulses are launched downwards  
71 from the space platform (Millán et al., 2014); consequently, the reflected laser pulses energy  
72 from the earth's surface or the top of a cloud are received. Subsequently, the atmospheric  
73 optical depth and flight time of the laser pulses passing through the air column are measured.  
74 Thus, the atmospheric pressure and altitude of the surface/cloud top can be simultaneously  
75 obtained, and the top of the cloud ground can be distinguished from the ground. Such data is  
76 meaningful for various meteorological applications. By obtaining the pressure values on the  
77 surface and cloud tops and combining the results with a vertical temperature profile obtained  
78 from other sensors or weather models and utilizing statistical equations, the vertical profile of  
79 atmospheric pressure can be obtained. The differential absorption LIDAR is installed on a  
80 sun-synchronous orbit, and it makes a polar orbit around the earth from south to north. It  
81 allows much denser surface/cloud top atmospheric pressure data than ground meteorological  
82 stations to be obtained.

83 This paper is structured as follows. Section 1 presents the Introduction, and Section 2, the  
84 mechanism of differential absorption LIDAR for detecting surface pressure was introduced.  
85 whereas Section 3 evaluates the performance of a differential absorption LIDAR model,  
86 Finally, Section 4 presents the summary.

## 87 2 Mechanism of Differential Absorption LIDAR to Detect Atmospheric Pressure

88 Differential absorption LIDAR selects two wavelengths in the A absorption band of oxygen  
89 (759–770nm). The laser beam with one wavelength value passes through the atmosphere  
90 twice; its absorption coefficient, although insensitive to changes in atmospheric temperature,  
91 is sensitive to variations in atmospheric pressure. This wavelength is referred to as the  
92 detection wavelength (online). Further, the absorption coefficient of another wavelength from  
93 the laser beam passing through the atmosphere twice is relatively smaller, and it is referred to  
94 as the reference wavelength (offline), with its value being close to the detection wavelength.

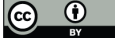

95 Let the atmospheric pressure at altitude  $R_0$ , where the LIDAR is located, be  $p(R_0)$ ; the  
 96 atmospheric pressure at altitude  $R$  be  $p(R)$ ; and  $g(z)$  be the gravitational acceleration at  
 97 altitude  $z$ . The difference in the atmospheric pressure between altitude  $R_0$  and  $R$  is equal to the  
 98 weight of the air column between  $R_0$  and  $R$  per unit area, where the dry air molecular mass  
 99  $m_{dry}=28.9644$  g/mol and water vapor molecular mass  $m_{wv}=18$  g/mol.  
 100 Atmospheric quasi-static equation:

$$101 \quad dp = -n_{dry}(z) \cdot (m_{dry} + m_{wv}\chi_{wv}(z)) \cdot g(z) dz \quad (1)$$

102 Gas state equation:

$$103 \quad p(z) = n_{dry}(z) \cdot (1 + \chi_{wv}(z)) \cdot kT(z) \quad (2)$$

$$104 \quad p(R) = p_{surface} \cdot \exp^{-\int_0^R \frac{(m_{dry} + m_{wv}\chi_{wv}(z))g(z)}{kT(z)(1 + \chi_{wv}(z))} dz} \quad (3)$$

105 This integration is performed at an altitude  $z$ ,  $n_{dry}(z)$  is the density of dry air molecules,  $\chi_{wv}(z)$   
 106 is the water vapor volume mixing ratio,  $p_{surface}$  is the surface pressure, and  $k$  is the Boltzmann  
 107 constant. Thus, by remote sensing the weight or mass per unit area of a vertical air column  
 108 between two altitudes, the difference in atmospheric pressure between these two altitudes can  
 109 be obtained.

110 Oxygen is among the most stable components in the atmosphere in terms of space and  
 111 time.  $n_{O_2}(z)$  is the number density of oxygen molecules at altitude  $z$ . The number of oxygen  
 112 molecules accounts for a fixed proportion of 20.948% of the number of dry air atmospheric  
 113 molecules. Further, the optical depth of the atmosphere between  $R_0$  and  $R$  is the integral of its  
 114 extinction coefficient with respect to the beam path, which can be expressed as

$$115 \quad OD(R_0, R) = \int_{R_0}^R [\alpha_a(v, z) + \alpha_m(v, z) + n_{O_2}(z)\sigma(v, p(z), T(z))] dz \quad (4)$$

116 where  $OD$  is the optical depth in Beer's theorem,  $\sigma$  is the absorption cross-section of the  
 117 oxygen molecule to the A-band  $\lambda$  wavelength, and  $\Delta\sigma$  is the difference  $\sigma(\lambda_{on}, p(z), T(z)) - \sigma(\lambda_{off},$   
 118  $p(z), T(z))$ . Further,  $\alpha_a(\lambda, z)$  and  $\alpha_m(\lambda, z)$  are the aerosol extinction coefficient and the extinction  
 119 coefficient of atmospheric molecules except for oxygen absorption, respectively,  
 120 and  $n_{O_2}(z)\sigma(\lambda, p(z), T(z))$  is the oxygen absorption coefficient of the corresponding  
 121 wavelength. The difference in the single-pass optical depth compared to the dual-wavelength  
 122 between  $R_0$  and  $R$  is referred to as the differential optical depth  $dOD(R_0, R)$ . Although the  
 123 weight of the atmospheric column between  $R_0$  and  $R$  per unit area is unknown, the differential  
 124 optical depth can be expressed as

$$125 \quad dOD(R_0, R) = \int_{R_0}^R n_{O_2}(z)(\sigma(v_{on}, z) - \sigma(v_{off}, z)) dz \quad (5)$$

$$126 \quad n_{O_2}(z) = \frac{0.20948p(z)}{kT(z) \cdot (1 + \chi(z))} \quad (6)$$

127 where  $N_{s,on}(R)/N_{s,off}(R)$  represents the online/offline dual-wavelength echo pulse energy  
 128 (number of photons) received by the LIDAR, which is expressed using the LIDAR equations  
 129 as follows:

$$130 \quad N_{s,on}(R) = \frac{c}{2} \frac{A_r \rho}{R^2 \pi} E_{on} \eta_r \eta_d \times \exp[-2OD(R_0, R)] \quad (7)$$

$$131 \quad N_{s,off}(R) = \frac{c}{2} \frac{A_r \rho}{R^2 \pi} E_{off} \eta_r \eta_d \times \exp[-2OD(R_0, R)] \quad (8)$$

132 Where  $E_{on}/E_{off}$  is the energy of a single shot emitted laser for both online/offline. Further,  $\eta_r$  is  
 133 the receiving efficiency of light beam,  $\eta_d$  is the quantum efficiency of the detector, and  $A_r$  is  
 134 the effective receiving area of the telescope. In the space-to-earth observation, IPDA, receives  
 135 return echo from hard targets on the ground, and  $\rho$  represents the reflectivity of ground targets.

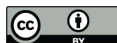

136 The beam of dual-wavelength has the same path, receiving/sending time, footprint, and  
 137 random process in the atmosphere. Further, except for  $\sigma(\lambda, p(z), T(z))$ , all other parameters are  
 138 considered to be similar (but not equal). Dividing Eq. (7) by Eq. (8), the differential optical  
 139 depth can be calculated by measuring the energy of the pulse emitted and the energy of  
 140 received return echo by the LIDAR as follows:

$$141 \quad dOD(R_0, R) = -\frac{1}{2} \ln \left\{ \left[ \frac{N_{on}(R)}{N_{off}(R)} \right] \left( \frac{E_{off}}{E_{on}} \right) \right\} + C \quad (9)$$

$$142 \quad C = \int_{R_0}^R [\alpha_a(v_{on}, z) - \alpha_a(v_{off}, z)] dz + \int_{R_0}^R [\alpha_m(v_{on}, z) - \alpha_m(v_{off}, z)] dz \quad (10)$$

143 where  $C$  represents a systematic error between the  $\frac{1}{2} \ln \left( \frac{N_{off}(R) E_{on}}{N_{on}(R) E_{off}} \right)$  value calculated from  
 144 the LIDAR data and the differential optical depth. Thus, laser shots of these two wavelengths  
 145 are simultaneously emitted and the reflections from the surface/cloud tops are received.  
 146 However, owing to the difference in oxygen absorption, the atmospheric transmittance of the  
 147 two wavelengths is different. The logarithm of the ratio of  $\frac{N_{off}(R) E_{on}}{N_{on}(R) E_{off}}$  can be used to obtain  
 148 the atmospheric differential optical depth from the satellite to the surface/cloud top. IPDA  
 149 launches several laser pulses from the space platform to the ground, and it detects the surface  
 150 pressure, with point  $R_0$  representing the satellite location. Further, there is almost no air  
 151 pressure  $p(R_0)=0.0$ , and  $p(R)$  represents the surface pressure  $p_{surface}$ .

152 In the path of the laser beam, only the section from the altitude of 71km to the ground has  
 153 a significant effect on the optical depth, whereas the effect of atmosphere above 71km can be  
 154 ignored. Further, the gravitational acceleration  $g(z)$  can be regarded as a constant 9.80616  
 155  $N/m^2$  at atmospheric altitude below 71 km.

156 On transforming the elevation  $z$  coordinates in Eq. (1) into atmospheric pressure  $p$   
 157 coordinates, the following is obtained

$$158 \quad n_{dry}(z) dz = \frac{dp}{(m_{dry} + m_{wv} \chi_{wv}(p)) g(p)} \quad (11)$$

159 Thus, the absorption cross-section  $\sigma(\lambda, p(z), T(z))$  is related to atmospheric temperature and  
 160 pressure, and thus it can be rewritten as  $\sigma(\lambda, p, T(p))$  in pressure  $p$  coordinates. Combining Eq.  
 161 (11), we can transform Eq. (5) from the elevation  $z$  coordinate to the pressure  $p$  coordinate.  
 162 The differential optical depth  $dOD$  associated with pressure  $p$  coordinates is expressed by

$$163 \quad dOD(p_{ground}, p_{top}) = 0.20948 \int_{p_{top}}^{p_{ground}} \frac{\Delta\sigma(v, p, T(p))}{(m_{dry} + m_{wv} \chi_{wv}(p)) g(p)} dp \quad (12)$$

164 Here we assume that the pressure at the top of the atmosphere is  $p_{top}=0.0$ , and the atmospheric  
 165 pressure at the surface (or cloud top)  $p_{ground}=p_{surface}$ .

$$166 \quad dOD(p_{surface}) = \frac{0.20948}{g} \int_0^{p_{surface}} \frac{\sigma(v_{on}, p, T(p)) - \sigma(v_{off}, p, T(p))}{m_{dry} + m_{wv} \chi_{wv}(p)} dp \quad (13)$$

167 Equation (13) establishes the implicit expression of the differential optical depth of the entire  
 168 aerosphere with respect to the surface pressure  $p_{surface}$ . Theoretically, the true value of the  
 169 differential optical depth is the state of the atmosphere and is not related to the LIDAR  
 170 parameters. Further, it is independent of the measurement method. However, the  
 171 measurement error of the differential optical depth is closely related to the LIDAR parameters.  
 172 In the pressure  $p$  coordinate, the differential optical depth  $dOD(p_{surface})$  is expressed through  
 173 the integral Eq. (14) as follows:

$$174 \quad dOD(p_{surface}) = \int_0^{p_{surface}} \frac{\sigma(v_{on}, p, T(p)) - \sigma(v_{off}, p, T(p))}{2.251667 \times 10^{-24} \times (1 + 0.6214 \chi_{wv}(p))} dp \quad (14)$$



175 On differentiating both sides of Eq. (13) with respect to  $p_{surface}$  and considering the derivative  
 176 function of  $dOD(p_{surface})$  with respect to  $p_{surface}$ , we obtain

$$177 \quad \frac{\partial(dOD(p_{surface}))}{\partial p_{surface}} = \frac{1}{46.8119} \times \frac{\sigma(v_{on} p_{surface} T(p_{surface})) - \sigma(v_{off} p_{surface} T(p_{surface}))}{m_{dry} + m_{wv} \chi_{wv}(p_{surface})} \quad (15)$$

178 Subsequently, the relationship between the errors of the surface pressure and the differential  
 179 optical depth of the entire atmosphere is obtained as

$$180 \quad \delta p_{surface} = \frac{46.8119 \times [m_{dry} + m_{wv} \chi_{wv}(p_{surface})]}{\sigma(v_{on} p_{surface} T(p_{surface})) - \sigma(v_{off} p_{surface} T(p_{surface}))} \delta [dOD(p_{surface})] \quad (16)$$

181 Assuming that the vertical profile of atmospheric temperature  $T(R)$  and the vertical profile of  
 182 water vapor mixing ratio  $\chi_{wv}(R)$  are known from data obtained from other sensors or weather  
 183 models, the surface pressure can be inverted from the differential optical depth of the entire  
 184 atmosphere. The steps are shown in Fig. 1.

185 a. The differential optical depth measurement value  $(dOD)_m$  of the atmosphere from the  
 186 echo signal  $N_s$  and emission energy  $E$  of the differential absorption LIDAR is calculated.

187 b. Utilizing the atmospheric temperature profile  $T(R)$  coupled with the pressure profile and  
 188 the surface pressure in the standard atmosphere mode as the initial value of the  
 189 atmospheric pressure profile  $p_1(R)$  and the initial value of the surface pressure  $p_{surface,1}$ ,  
 190 respectively, and using the oxygen HITRAN database, the initial value of the absorption  
 191 coefficient profile of the entire atmosphere is calculated. Thereafter, the initial value of the  
 192 differential optical depth  $(dOD)_{c,1}$  of the entire atmosphere is calculated.

193 c. If the differential optical depth  $(dOD)_{c,i}$  of the entire atmosphere is numerically  
 194 calculated in  $i$ -th cycle and  $(dOD)_{c,i}$  is not equal to the differential optical depth  $(dOD)_m$   
 195 measured by the LIDAR, then the surface pressure  $p_{surface,i}$  calculated using the numerical  
 196 value is not equal to the true value  $p_{surface}$  of the pressure at the footprint, and thus,  $(dOD)_m$   
 197 is subtracted from  $(dOD)_{c,i}$ .

198 d. The surface pressure varies with the differential optical depth. In the  $i$ -th cycle, the  
 199 difference between  $(dOD)_{c,i}$  and  $(dOD)_m$  is multiplied by a coefficient  
 200  $\frac{46.8119 \times [m_{dry} + m_{wv} \chi_{wv}(surface,i)]}{\sigma(v_{on} p_{surface,i} T_{surface,i}) - \sigma(v_{off} p_{surface,i} T_{surface,i})}$  in Eq. (16) as the compensation amount  
 201 and added to the calculated value of the surface pressure  $p_{surface,i}$ . Consequently, the  
 202 resulting sum is used as the new surface pressure  $p_{surface,i+1}$ ;  $p_{surface,i+1} = p_{surface,i} +$   
 203  $\frac{46.8119 \times [m_{dry} + m_{wv} \chi_{wv}(surface,i)]}{\sigma(v_{on} p_{surface,i} T_{surface,i}) - \sigma(v_{off} p_{surface,i} T_{surface,i})} (dOD_{c,i} - dOD_m)$ .

204 e. Subsequently, with atmospheric temperature profile  $T(R)$  and water vapor mixing ratio  
 205  $\chi_{wv}(R)$  provided by other sensors or numerical weather models, coupled with the surface  
 206 pressure result  $p_{surface,i}$  obtained in the  $i+1$ -th cycle, the atmospheric pressure profile  $p_{i+1}(R)$

$$207 \quad \text{is calculated, } p_{i+1}(R) = p_{surface,i} \cdot \exp^{-\int_0^R \frac{(m_{dry} + m_{wv} \chi_{wv}(z))g(z)}{kT(z)(1 + \chi_{wv}(z))} dz}$$

208 f. Further, with the atmospheric temperature profile  $T(R)$ , profile for water vapor mixing  
 209 ratio  $\chi_{wv}(R)$ , and the atmospheric pressure profile  $p_{i+1}(R)$ , based on the HITRAN database,  
 210 differential optical depth  $(dOD)_{c,i+1}$  calculations are repeated.

211 g. Repeat steps c–f. In the case of the above iterative process, with increase in  $i$ , the  
 212 difference between  $(dOD)_{c,i}$  and  $(dOD)_m$  decreases till  $i=M$ ,  $p_{surface, M+1} - p_{surface, M}$  is  
 213 comparable to the error. If that happens, the iterative loop stops. Herein, the output surface  
 214 pressure  $p_{surface, M}$  calculation result is considered to be sufficiently close to the true value  
 215  $p_{surface}$ .

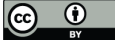

216 The above calculation steps also suggest that the parameters related to the temperature,  
 217 pressure, and humidity of the atmosphere should be detected synchronously in the future, as  
 218 input conditions for each other, and simultaneously iterated.

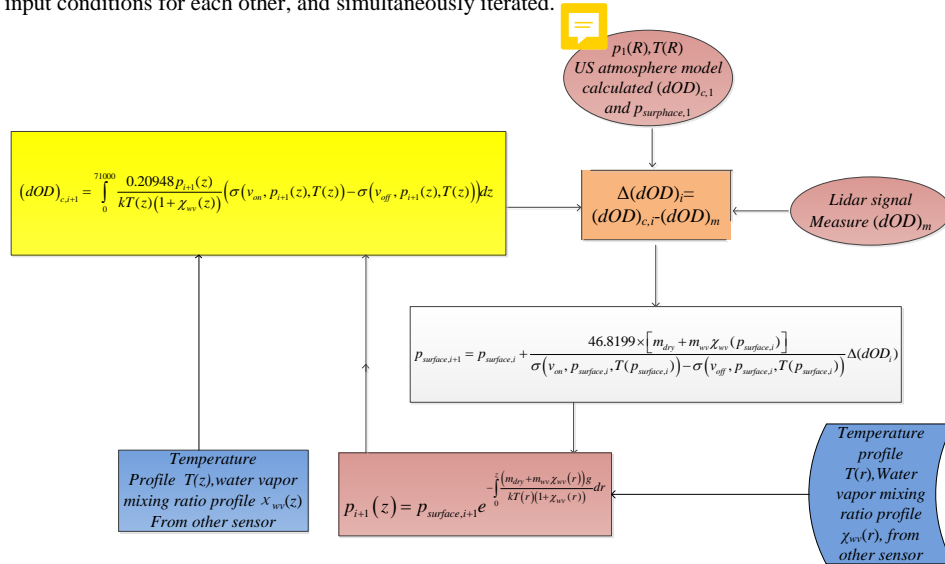

219  
 220

221 **Figure 1:** Iterative calculation process of the atmospheric pressure on the surface of the  
 222 differential optical depth measured by the differential absorption LIDAR.

### 223 3 Performance evaluation of an integrated path differential absorption LIDAR model

#### 224 3.1 A-band absorption spectrum of Oxygen

225 The absorption line of oxygen molecules is broadened in the atmosphere via collision and  
 226 Doppler broadening. They are expressed via the famous Lorentz and Gauss line shapes,  
 227 respectively. Below 15km in the atmosphere, collision broadening is dominant, with “n”  
 228 representing the sensitivity factor of collision broadening with respect to air temperature, that  
 229 is, the average value of its own broadening and nitrogen broadening sensitivity factors. We  
 230 consider  $n=0.73-0.59$  from HITRAN database, normal pressure  $p_0=1013.25\text{hPa}$ , normal  
 231 temperature  $T_0=296\text{K}$ ,  $\gamma_0$  is the pressure broadening under normal temperature and normal  
 232 pressure,  $S_0$  is the intensity of the absorption line at room temperature and pressure,  $\sigma_0$  is the  
 233 peak absorption cross section of the absorption line at room temperature and pressure,  $c$  is the  
 234 speed of light,  $h$  is the Planck constant,  $m$  is the molecular mass of oxygen, and  $\nu_0(\text{cm}^{-1})$   
 235 represents the position of the center wave number (light frequency) of the absorption line.  
 236 Further,  $E''$  is the energy of the low-energy state of the electron. Moreover, in the application  
 237 of differential absorption LIDAR, the absorption line shape of the oxygen molecule can be  
 238 represented using the Voigt line shape, which is a form of the convolution Gauss line shape  
 239 with Lorentz line shape. The arbitrary real number  $t$  is the variable of the Voigt linear integral.  
 240 The absorption cross-section  $\sigma(\nu)$  at the light wave number  $\nu$  is written as  $\sigma(\nu) =$   
 241  $\sigma_0 \frac{y}{\pi} \int_{-\infty}^{\infty} \frac{\exp(-t^2)}{y^2 + (x-t)^2} dt$ , where  $x = \left(\frac{\nu - \nu_0}{\nu_0}\right) \left(\frac{m}{2kT}\right)^{0.5} c$  and  $y = \nu_0 \gamma_0 \left(\frac{p}{p_0}\right) \left(\frac{T_0}{T}\right)^n \left(\frac{m}{2kT}\right)^{0.5} c$ , and  
 242  $\sigma_0 = \frac{S_0 c}{\nu_0} \left(\frac{2\pi kT}{m}\right)^{0.5} \left(\frac{T_0}{T}\right)^{1.5} \exp\left[\frac{E'' c}{k} \left(\frac{1}{T_0} - \frac{1}{T}\right)\right]$ . The wavelength in the trough between the oxygen  
 243 absorption line P13Q12 and P13P13, between the oxygen absorption line P15P15 and  
 244 P15Q14, and even absorption lines P17Q16 and P17P17 can be selected as the detection



245 wavelength. Table 1 lists certain parameters of the six absorption lines: for example, the  
 246 linear function  $\sigma_q(\nu-\nu_{01})$  of the absorption cross-section of the oxygen absorption line P13Q12  
 247 with respect to the wave number  $\nu$ , and the line function  $\sigma_p(\nu-\nu_{02})$  of the absorption cross  
 248 section of the P13P13 with respect to the wave number  $\nu$ . Further, the wavelength  $\lambda_{on}$   
 249 (wavenumber  $\nu_{on}$ ) we selected is located at the minimum of the absorption cross-section  
 250 between the two spectral lines, that is, its absorption cross-section is the superposition of the  
 251 values of the extension lines of two adjacent Voigt linear functions at  $\nu_{on}$ . Moreover, its  
 252 absorption cross-section  $\sigma_{on}(\nu) = \sigma_p(\nu_{on}) + \sigma_q(\nu_{on})$ —the wings of the two Voigt lineshape  
 253 functions—is the manifestation of their pressure expansion.

254 **Table 1 Parameters of the three groups of absorption lines of Oxygen A(296K) (Brown and Plymate, 2014)**

| Assignment | Line center<br>$\nu_0$<br>cm <sup>-1</sup> | Intensity<br>$S_0$<br>cm mole <sup>-1</sup> | Low energy<br>$E''$<br>cm <sup>-1</sup> | Half Widths                             |                                          | Pressure-introduced shift<br>Average( $\delta$ )<br>cm <sup>-1</sup> /atm | Temperature dependence<br>$n$ |
|------------|--------------------------------------------|---------------------------------------------|-----------------------------------------|-----------------------------------------|------------------------------------------|---------------------------------------------------------------------------|-------------------------------|
|            |                                            |                                             |                                         | $\gamma_0$                              |                                          |                                                                           |                               |
|            |                                            |                                             |                                         | $\gamma_{air}$<br>cm <sup>-1</sup> /atm | $\gamma_{self}$<br>cm <sup>-1</sup> /atm |                                                                           |                               |
| P13Q12     | 13078.2275                                 | $5.61 \times 10^{-24}$                      | 260.6824                                | 0.0466<br>(0.6)                         | 0.0461<br>(1.1)                          | -0.0061                                                                   | 0.73                          |
| P13P13     | 13076.3273                                 | $6.13 \times 10^{-24}$                      | 262.5827                                | 0.0467<br>(0.8)                         | 0.0460<br>(1.1)                          | -0.0068                                                                   | 0.73                          |
| P15Q14     | 13069.9619                                 | $4.33 \times 10^{-24}$                      | 343.9694                                | 0.0457<br>(1.2)                         | 0.0449<br>(1.6)                          | -0.0051                                                                   | 0.73                          |
| P15P15     | 13068.0818                                 | $4.68 \times 10^{-24}$                      | 345.8495                                | 0.0455<br>(1.2)                         | 0.0452<br>(1.6)                          | -0.0064                                                                   | 0.73                          |
| P17Q16     | 13061.3273                                 | $3.09 \times 10^{-24}$                      | 438.7010                                | 0.044                                   | 0.045                                    | -0.00898                                                                  | 0.73                          |
| P17P17     | 13059.4665                                 | $3.31 \times 10^{-24}$                      | 440.5618                                | 0.0452                                  | 0.045                                    | -0.00902                                                                  | 0.59                          |

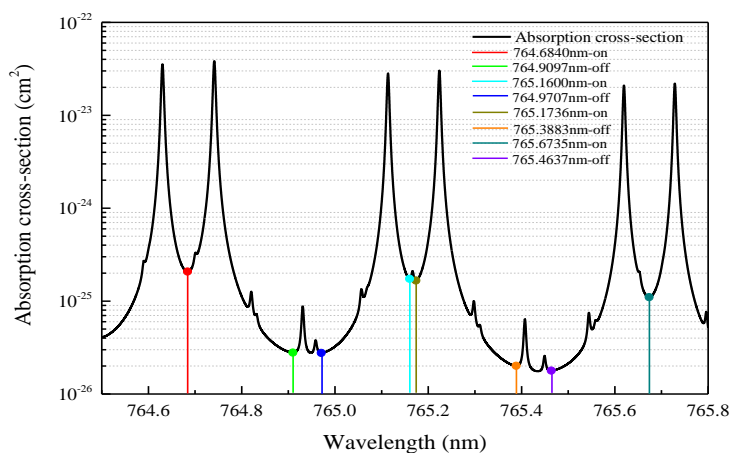

255  
 256

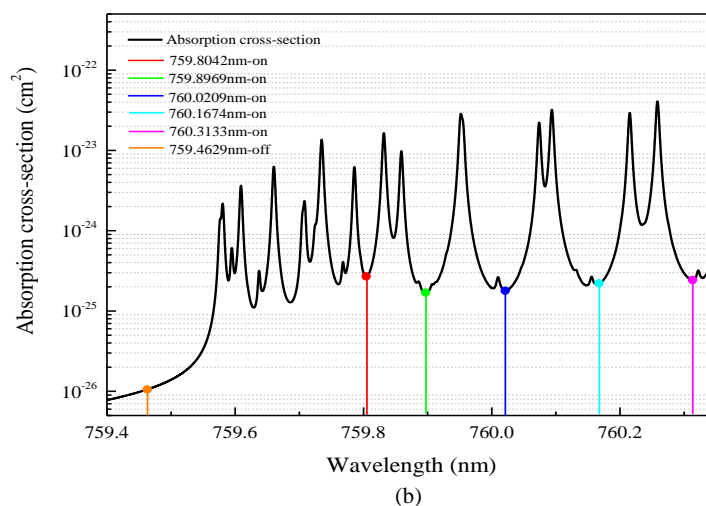

257  
258  
259  
260  
261

Figure 2: (a)Near-ground absorption cross-section near 765nm,(b)Near-ground absorption cross-section near 760nm

262 Within the A absorption band of oxygen (759–770nm), the spectral transmittances in the  
263 vicinity of 760 and 765nm were relatively insensitive to temperature, this band is the low  
264 interference of water vapor and carbon dioxide molecules. Further,the atmospheric  
265 transmittance at 760nm is lower than the atmospheric transmittance at 765nm, and when  
266 ground-based LIDAR (RR-DIAL) detects tropospheric backscattering owing to the round-trip  
267 optical path being shorter, two adjacent lines near 760nm can be selected. In addition, the  
268 plots of absorption spectra shown in Figure 2, the Oxygen absorption features with a number  
269 of smaller and sharper absorption spikes, it contains isotopologues of Oxygen molecules,  
270 showing some subtle differences, the wavelength in the middle of the trough area between  
271 lines is more suitable as the ~~detection wavelength~~ online and the reference wavelength offline  
272 ( Korb et al., 1983,1989; Schwemmer, et al., 1987). When IPDA shoots lasers  
273 from the satellite and receives the echo from the ground surface, the laser beam that passes through the  
274 entire atmosphere twice results in the path being longer. Thus, 765nm is relatively more  
275 suitable for remote sensing of surface pressure from satellites(Riris et al., 2017 ).



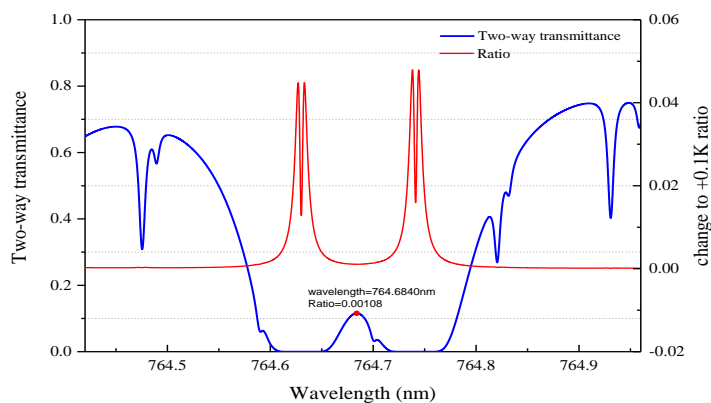

276

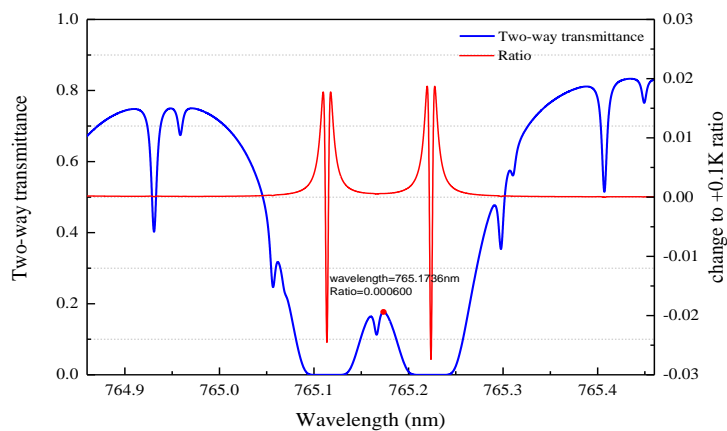

277

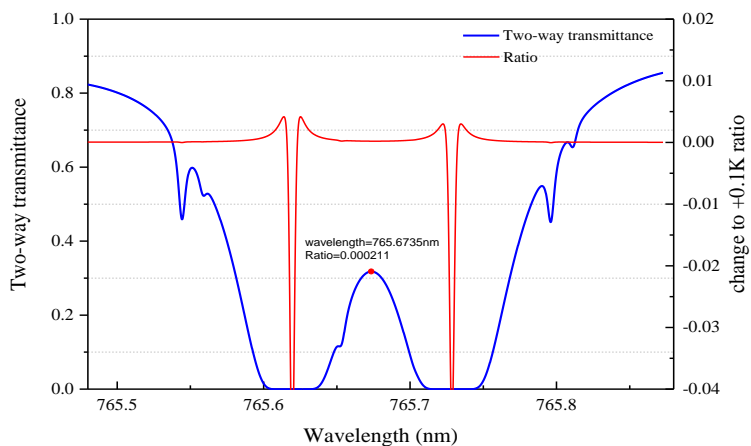

278

279

280

**Figure 3:** Transmittance spectra of three intervals around 765nm and their ratio to 0.1K change in temperature

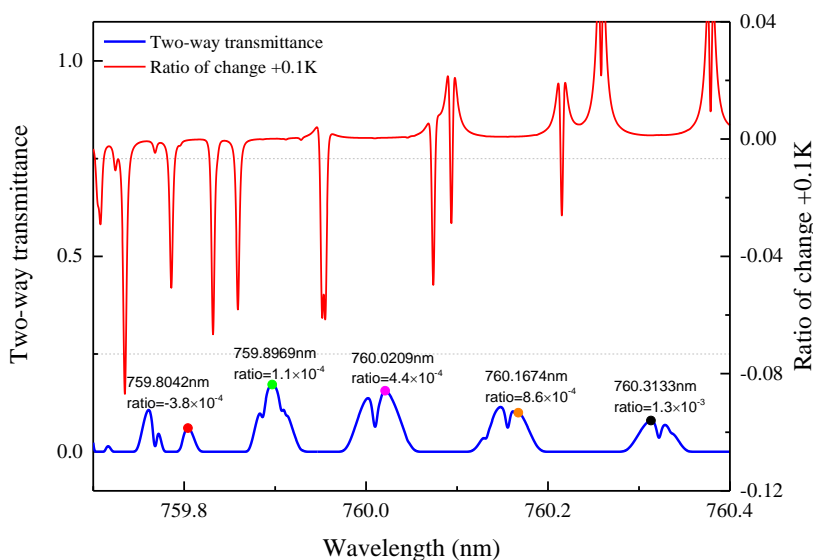

281  
 282  
 283

**Figure 4:** Transmittance spectra around 760nm and their ratio to 0.1K change in temperature

284 The absorptive optical depth of oxygen  $dOD(p_{surface})$  with respect to the path 0–71km  
 285 corresponds to the optical transmittance  $e^{-2dOD}$  of this path with respect to the  $\nu$  wavenumber.  
 286 Figure 3 shows the transmittance spectra of three intervals around 765nm and their sensitivity  
 287 to temperature changes of +0.1K. Similarly, Figure 4 shows the transmittance spectra of  
 288 around 760nm and their sensitivity to temperature changes of +0.1K.  
 289

290  
 291

**Table 2 differential optical depth and differential absorption cross section of 9 pairs of wavelengths in standard atmospheric mode**

| Wavelength(nm) | $\int_0^{71} (\alpha_m + \alpha_a) dz$ | $\int_0^{71} (n_{O_2} \sigma) dz$ | $OD(0,71km)$ | $\sigma_{O_2} (cm^2)$  | $dOD(0,71km)$ | $\Delta\sigma_{O_2} (cm^2)$ |
|----------------|----------------------------------------|-----------------------------------|--------------|------------------------|---------------|-----------------------------|
| on 764.6840    | 0.1852                                 | 0.493                             | 0.678        | $2.08 \times 10^{-25}$ | 0.428         | $1.80 \times 10^{-25}$      |
| off 764.9097   | 0.1851                                 | 0.0653                            | 0.251        | $2.80 \times 10^{-26}$ |               |                             |
| on 765.1600    | 0.1851                                 | 0.389                             | 0.574        | $1.74 \times 10^{-25}$ | 0.325         | $1.46 \times 10^{-25}$      |
| off 764.9707   | 0.1851                                 | 0.0638                            | 0.249        | $2.77 \times 10^{-26}$ |               |                             |
| on 765.1736    | 0.1849                                 | 0.373                             | 0.558        | $1.67 \times 10^{-25}$ | 0.328         | $1.47 \times 10^{-25}$      |
| off 765.3883   | 0.1849                                 | 0.0448                            | 0.230        | $2.01 \times 10^{-26}$ |               |                             |



|     |          |        |        |       |                        |       |                        |
|-----|----------|--------|--------|-------|------------------------|-------|------------------------|
| on  | 765.6735 | 0.1848 | 0.231  | 0.416 | $1.10 \times 10^{-25}$ | 0.192 | $9.25 \times 10^{-26}$ |
| off | 765.4637 | 0.1849 | 0.0391 | 0.224 | $1.78 \times 10^{-26}$ |       |                        |
| on  | 759.8042 | 0.1872 | 0.515  | 0.702 | $2.60 \times 10^{-25}$ | 0.493 | $2.49 \times 10^{-25}$ |
| off | 759.4629 | 0.1873 | 0.0216 | 0.209 | $1.46 \times 10^{-26}$ |       |                        |
| on  | 759.8969 | 0.1871 | 0.343  | 0.530 | $1.66 \times 10^{-25}$ | 0.321 | $1.55 \times 10^{-25}$ |
| off | 759.4629 | 0.1873 | 0.0216 | 0.209 | $1.46 \times 10^{-26}$ |       |                        |
| on  | 760.0209 | 0.1871 | 0.385  | 0.573 | $1.77 \times 10^{-25}$ | 0.364 | $1.67 \times 10^{-25}$ |
| off | 759.4629 | 0.1873 | 0.0216 | 0.209 | $1.46 \times 10^{-26}$ |       |                        |
| on  | 760.1674 | 0.1870 | 0.506  | 0.693 | $2.22 \times 10^{-25}$ | 0.484 | $2.12 \times 10^{-25}$ |
| off | 759.4629 | 0.1873 | 0.0216 | 0.209 | $1.46 \times 10^{-26}$ |       |                        |
| on  | 760.3133 | 0.1870 | 0.576  | 0.763 | $2.46 \times 10^{-25}$ | 0.554 | $2.36 \times 10^{-25}$ |
| off | 759.4629 | 0.1873 | 0.0216 | 0.209 | $1.46 \times 10^{-26}$ |       |                        |

292

293 Equation (16) clearly indicates that in various factors that result in  $\delta[dOD(p_{\text{surface}})]$ , the error  
 294 of differential optical depth conditionally causes conditionally causes the error  $\delta p_{\text{surface}}$  of the  
 295 surface pressure. Additionally, the detection wavelength absorption cross-section difference  
 296  $\Delta\sigma(p_{\text{surface}})$  near the ground is inversely proportional to the surface pressure error. Evidently, a  
 297 key factor affecting DIAL sensitivity is the online and offline wavelength positions. However,  
 298 for the candidate wavelengths marked in Fig. 2 used as detection wavelengths, each would  
 299 offer its own advantages and disadvantages, and consequently, comprehensive evaluation is  
 300 required.

### 301 3.2 Differential absorption LIDAR system model

302 The research results reported by Coney, *et al.*(Munk et al., 2016-2019; Coney et al., 2021;  
 303 Thomas et al., 2016; Strotkamp et al., 2019)along with those reported by Wulfmeyer  
 304 and ösenberg et al.(1996), refer to the ADM-Aeolus in orbit ALADIN system parameters of  
 305 the Aeolus mission (Lemmerz et al., 2017); the receiver is based on the GLAS-Mission-  
 306 1064nm receiver, the orbit altitude is 400km, and diameter of the telescope is 1.5m.  
 307 Consequently, the model parameters of the differential absorption LIDAR has been proposed,  
 308 as shown in Table 3. The transmitter model parameters, with the exception of the pulse  
 309 energy of 100mJ, have been separately reported in different documents(Coney et al.,  
 310 2021).However, these indicators have been achieved in the same laser, and thus, more  
 311 research is required.

312

**Table 3 System parameters of differential absorption LIDAR**

|                    |       |
|--------------------|-------|
| Transmitter        |       |
| Laser pulse energy | 100mJ |



|                                                            |                                           |
|------------------------------------------------------------|-------------------------------------------|
| Laser pulse Width                                          | 88ns                                      |
| Pulse repetition rate                                      | 100Hz                                     |
| Laser Divergence Angle                                     | 90 $\mu$ rad for $\pm 3\sigma$            |
| Spectral purity                                            | 99.99%                                    |
| Pointing stability                                         | < 10 $\mu$ rad                            |
| <b>Receiver</b>                                            |                                           |
| Telescope Diameter ( $A_r$ )                               | 1.5m(SiC)                                 |
| Receiver Field-of-view (full)                              | 100 $\mu$ rad                             |
| Optical Filter Bandwidth ( $FW$ )                          | 0.8nm(FWHM)                               |
| Fabry-Perot Elton (thickness=2mm)                          | 25pm(free spectral range $\approx$ 0.1nm) |
| Receiver Efficiency                                        | 50%                                       |
| Combined filter width                                      | 0.025nm                                   |
| Detector and amplifier                                     |                                           |
| Detector(Laser Components DG, Inc)                         | Si-APD(SAR1500/C30956/S3884-04)           |
| APD Quantum Efficiency ( $\eta_d$ )                        | 75%                                       |
| Detector Diameter                                          | $\Phi$ 1.5mm                              |
| Electronic system bandwidth ( $BW$ )                       | 3MHz                                      |
| APD dark current ( $I_d$ )                                 | 1nA type                                  |
| APD gain( $M$ )                                            | 100                                       |
| APD excess noise factor( $F$ )                             | 2.4                                       |
| APD capacitance ( $C_d$ )                                  | 4pF                                       |
| trans-impedance amplifier gain ( $R_f$ )                   | 20kV/A                                    |
| trans-impedance amplifier input current noise ( $I_{nA}$ ) | 2.5pA/Hz <sup>1/2</sup>                   |
| trans-impedance amplifier input voltage noise ( $V_{nA}$ ) | 20nV/Hz <sup>1/2</sup>                    |
| operate temperature                                        | 293 K                                     |
| <b>Platform and environment</b>                            |                                           |
| Orbit altitude and velocity                                | 400 km, 7 km/s                            |
| Orbit type                                                 | Polar, sun synchronous, dawn/dusk         |
| Along-track resolution                                     | 44 km                                     |
| Simulation top altitude                                    | 71 km                                     |
| Viewing geometry                                           | Nadir                                     |
| Atmosphere model                                           | US standard atmosphere                    |
| Aerosol model                                              | Median aerosol profile                    |
| (765nm)the surface albedo over ocean/land                  | 0.1575/0.314                              |
| Pointing stability                                         | < 50 $\mu$ rad                            |
| Spectroscopic data base                                    | HITRAN 2012                               |

313 As reported in reference (Lancaster et al., 2005), the equivalent Lambertian reflection  
 314 coefficient of the sub-satellite point laser on the ocean surface has an empirical relationship  
 315  $\rho_{eff} = \frac{\rho}{4(S^2)}$ , where the Fresnel reflection coefficient is  $\rho = 0.02$ , and  $\langle S^2 \rangle$  is the variance of  
 316 the wave steepness distribution. Further, Bufton et al.(1983)and Menzies et  
 317 al.(1998)individually adopted relationship as follows:



$$\langle S^2 \rangle = \begin{cases} (\ln U_{10} + 1.2) \times 10^{-2} \\ (0.85 \ln U_{10} - 1.45) \times 10^{-1} \end{cases} \quad U_{10} \leq 7.0 \text{ m/s} / U_{10} > 7.0 \text{ m/s} \quad (17)$$

where  $U_{10}$  is the wind speed of segment 10m above the ocean surface. The general ocean surface wind speed is taken as 8m/s, whereas  $\rho_{\text{eff}} = 0.1575$  and  $\rho_{\text{eff}}\pi = 0.025 \text{ sr}^{-1}$ . In addition, the reflectivity of terrestrial lasers is generally 0.314.

### 3.3 Performance evaluation of A-band DIAL system

#### 3.3.1 Random error of differential optical depth caused by noise

The number of received return echo photons  $N_{s,\text{on}}$  and  $N_{s,\text{off}}$  is obtained using the LIDAR Eq. (7) and Eq.(8). Equations(18)–(25) are commonly used for the on and off channels.

$$N_s(R_0, R) = \frac{\lambda \cdot E}{h \cdot c} \cdot A_r \cdot \eta_d \cdot \eta_r \cdot \left(\frac{\rho}{\pi}\right) \cdot \frac{\exp[-2OD(R_0, R)]}{(R_0 - R)^2} \quad (18)$$

Here the working and reference wavelengths  $\lambda_{\text{on}}$  and  $\lambda_{\text{off}}$ , the Planck constant is  $h$ ,  $\rho$  is the surface reflectivity, and  $c$  is the speed of light. Further, the effective pulse width  $\tau_w$  of the echo signal is a combination of the emitted laser pulse width  $\tau_L$ , and the detection electronic system bandwidth  $BW$  (unit Hz), effective target altitude within the laser footprint  $\Delta H$ ,  $R_0=400\text{km}, \Delta H=2 \text{ m}$ , can be expressed as (Ehret, et al., 2008):

$$\tau_w = \sqrt{\tau_L^2 + \left(\frac{1}{3} \cdot BW\right)^2 + \left(\frac{2 \cdot \Delta H}{c}\right)^2} \quad (19)$$

The background signal  $N_{BG}$  (photoelectrons), assuming a Lambertian surface and zenith sun, is calculated as

$$N_{BG}(\lambda) = \frac{\lambda \cdot S_{BG}}{h \cdot c} \tau_w \cdot A_r \cdot \eta_d \cdot \eta_r \cdot \left(\frac{\rho}{\pi}\right) \cdot \left(\frac{FOV}{2}\right)^2 \pi \cdot FW \cdot \exp[-2OD(R_0, R)] \quad (20)$$

where  $S_{BG}$  is the exo-atmospheric solar irradiance value ( $1.221 \text{ W m}^{-2} \text{ nm}^{-1}$ ) (ASTM international, United States, 2019) at 765nm.  $FW$  is the bandwidth of the optical filter ( $0.025 \text{ nm} \times 4$ ) and the field of view (FOV) (unit rad) of the  $FOV$  receiving telescope. The bandwidth of the Fabry–Perot etalon, free spectral range, and width of the narrowband filter were 25pm, 0.1nm, and 0.8nm, respectively. There are 8 longitudinal modes of Fabry–Perot etalon that can pass through. However, the transmittance of each longitudinal mode is different, and thus, the equivalent solar window width is  $25 \text{ pm} \times 4 = 0.1 \text{ nm}$ . Further, the backscattering coefficient ( $\rho/\pi$ ) on the surface of land such as ocean and vegetation during the daytime (Thomas et al., 2016), and  $\rho$  were calculated as 0.1575 and 0.314, respectively.

Here the  $q$  electrons charge is  $1.6 \times 10^{-19} \text{ C}$ ,  $M$  is the gain of silicon avalanche diode (APD). The total noise associated with the detection signal is divided into fixed circuit noise and signal-dependent shot noise. The total circuit noise current spectral density (unit  $\text{A}/\text{Hz}^{1/2}$ )  $I_n$ , can be expressed as (Refaat, et al., 2013)

$$I_n = \sqrt{2 \cdot q \cdot I_d \cdot M \cdot F + I_{nA}^2 + \frac{V_{nA}^2}{R_f^2} + \frac{4 \cdot k \cdot T}{R_f + \frac{(2 \cdot \pi \cdot V_{nA} \cdot C_d \cdot BW)^2}{3}}} \quad (21)$$

where  $I_d$  and  $F$  are the dark current and excess noise factors of the detector, respectively;  $I_{nA}$  and  $V_{nA}$  are the preamplifier integrated input current and input voltage noise spectral density, respectively;  $R_f$  is the feedback resistance of the preamplifier; and  $C_d$  is the equivalent input capacitance of the amplifier and the detector. The circuit noise is often limited by the shot noise of the dark current of the detector or the noise of the preamplifier. In this analysis, all circuit noises refer to the detector input and the equivalent circuit noise-generated photoelectrons, and  $N_{n,C}$ , is calculated as



357 
$$N_{n,C} = \frac{I_n \cdot \tau_w \cdot \sqrt{BW}}{q \cdot M} \quad (22)$$

358 Similarly, the equivalent shot noise-generated photoelectrons,  $N_{n,S}$ , are calculated as

359 
$$N_{n,S} = \sqrt{2 \cdot N_S \cdot F \cdot \tau_w \cdot BW} \quad (23)$$

360 Further, the photoelectron  $N_{n,BG}$ , equivalent to the equivalent shot noise associated with the  
 361 background radiation can be calculated as

362 
$$N_{n,BG} = \sqrt{2 \cdot N_{BG} \cdot F \cdot \tau_w \cdot BW} \quad (24)$$

363 These noises are regarded as the equivalent photoelectron number generated in the detector  
 364 (before the multiplication process), and are proportional to the actual detected photoelectron  
 365 number. The total signal-to-noise ratio is expressed as follows(Ehret, *et al.*, 2008):

366 
$$SNR_{on/off} = \frac{N_{s,on/off}}{\sqrt{N_{n,C}^2 + N_{n,S,on/off}^2 + N_{n,BG,on/off}^2}} \quad (25)$$

367 Where  $s$  is the number of echo signal pulses accumulated and averaged by the LIDAR. The  
 368 error  $\varepsilon_R$  caused by the noise of the LIDAR receiving a single echo is a random error.  
 369 Moreover, it is necessary to calibrate the LIDAR echo signal detection channel and the laser  
 370 emission pulse energy monitoring channel to remove nonlinear and nonzero biased  
 371 background voltage. Further, the calibration error and AD conversion error comprise the  
 372 systematic error. In addition, the error  $\varepsilon_A$  caused by the uncertainty of atmospheric  
 373 environment (atmospheric temperature profile, atmospheric water vapor mixing ratio profile),  
 374 and the associated error  $\varepsilon_T$  of the laser emission characteristics (jitter of the center wavelength  
 375 of the emitted beam, the emission spectrum width, and the purity of the emission spectrum)  
 376 are all systematic errors. The total error of the differential optical depth can be expressed as

377 
$$\delta[dOD] = \frac{\varepsilon_R}{\sqrt{s}} + \sqrt{\varepsilon_A^2 + \varepsilon_T^2} \quad (26)$$

378 Equation(9) indicates that the random noise of the echo signals  $N_{on}(R)$  and  $N_{off}(R)$  and the  
 379 random measurement error of the pulse energies  $E_{on}$  and  $E_{off}$  result in the random error of the  
 380 differential optical depth  $\varepsilon_R = \delta[dOD(p_{surface})]_R$  as follows:

381 
$$\varepsilon_R = \delta[dOD(p_{surface})]_R = \frac{1}{2} \sqrt{\left(\frac{\delta N_{s,on}(R)}{N_{s,on}(R)}\right)^2 + \left(\frac{\delta N_{s,off}(R)}{N_{s,off}(R)}\right)^2 + \left(\frac{\Delta E_{on}}{E_{on}}\right)^2 + \left(\frac{\Delta E_{off}}{E_{off}}\right)^2} \quad (27)$$

382 The signal-to-noise ratio of LIDAR can be calculated using Eq.(18)–(25). Simultaneously, it  
 383 is considered that the measurement error of pulse energy  $\Delta E_{on}/E_{on} \approx \Delta E_{off}/E_{off}$  is very small  
 384 and can thus be ignored. The random error of LIDAR echo (noise) measurement is calculated  
 385 as

386 
$$\varepsilon_R = \frac{1}{2} \sqrt{SNR_{on}^{-2} + SNR_{off}^{-2}} \quad (28)$$

387 When the laser irradiates the ocean surface (for example, the average wind speed is 8m/s),  
 388 0.1575 represents median for the ocean surface reflectivity(Ehret, *et al.*, 2008), and the  
 389 random error  $\varepsilon_R$  of the differential optical depth is calculated considering the single pulse echo;  
 390 with a time resolution of at least 6.25 s ,the distance resolution along the track of 44km and  $S$   
 391  $= 625$  laser pulse echoes are taken as a group for cumulative average, the random error of the  
 392 atmospheric differential optical depth above the ocean surface is  $\frac{\varepsilon_R}{\sqrt{625}}$ .

393 The ocean surface possesses low laser reflectivity and weak echoes. The averaging  
 394 method employed is as follows: first add up 625 echoes; thereafter subtract  $B$  and normalize,



395 where  $B$  is the level background baseline of the LIDAR output; and finally Eq. (25) provides  
 396 the differential optical depth.

397 
$$E_{on} = \sum_{i=1}^{625} E_{i,on} \quad (29-1)$$

398 
$$E_{off} = \sum_{i=1}^{625} E_{i,off} \quad (29-2)$$

399 
$$N_{s,on} = \sum_{i=1}^{625} N_{i,s,on} \quad (29-3)$$

400 
$$N_{s,off} = \sum_{i=1}^{625} N_{i,s,off} \quad (29-4)$$

401 
$$dOD = OD_{on} - OD_{off} = -\frac{1}{2} \ln\left(\frac{N_{s,on}-B}{E_{on}}\right) + \frac{1}{2} \ln\left(\frac{N_{s,off}-B}{E_{off}}\right) \quad (30)$$

402

403

**Table 4 Error from noise**

| Wavelength(nm) | SNR    |        | Single shot Noise Error |         | average Noise Error   |                       |
|----------------|--------|--------|-------------------------|---------|-----------------------|-----------------------|
|                | ocean  | land   | ocean                   | land    | Ocean/25              | Land/12               |
|                | 0.1575 | 0.314  | 0.1575                  | 0.314   | 0.1575                | 0.314                 |
| 764.6840       | 97.74  | 139.68 | 0.0061                  | 0.0043  | $2.44 \times 10^{-4}$ | $3.55 \times 10^{-4}$ |
| 764.9097       | 152.1  | 215.8  |                         |         |                       |                       |
| 765.1600       | 109.0  | 155.5  | 0.0056                  | 0.0040  | $2.24 \times 10^{-4}$ | $3.30 \times 10^{-4}$ |
| 764.9707       | 152.3  | 216.2  |                         |         |                       |                       |
| 765.1736       | 110.9  | 158.0  | 0.0055                  | 0.0039  | $2.20 \times 10^{-4}$ | $3.24 \times 10^{-4}$ |
| 765.3883       | 155.4  | 220.5  |                         |         |                       |                       |
| 765.6735       | 128.4  | 182.6  | 0.0050                  | 0.0035  | $2.00 \times 10^{-4}$ | $2.96 \times 10^{-4}$ |
| 765.4637       | 156.3  | 221.8  |                         |         |                       |                       |
| 759.8042       | 95.06  | 135.9  | 0.00614                 | 0.00430 | $2.46 \times 10^{-4}$ | $3.58 \times 10^{-4}$ |
| 759.4629       | 158.1  | 224.3  |                         |         |                       |                       |
| 759.8969       | 113.7  | 161.9  | 0.00542                 | 0.00381 | $2.17 \times 10^{-4}$ | $3.17 \times 10^{-4}$ |
| 759.4629       | 158.1  | 224.3  |                         |         |                       |                       |
| 760.0209       | 108.8  | 155.1  | 0.00558                 | 0.00392 | $2.23 \times 10^{-4}$ | $3.27 \times 10^{-4}$ |
| 759.4629       | 158.1  | 224.3  |                         |         |                       |                       |
| 760.1674       | 95.98  | 137.2  | 0.00609                 | 0.00427 | $2.44 \times 10^{-4}$ | $3.56 \times 10^{-4}$ |
| 759.4629       | 158.1  | 224.3  |                         |         |                       |                       |



|          |       |       |         |         |                       |                       |
|----------|-------|-------|---------|---------|-----------------------|-----------------------|
| 760.3133 | 89.15 | 127.7 |         |         |                       |                       |
| 759.4629 | 158.1 | 224.3 | 0.00644 | 0.00451 | $2.58 \times 10^{-4}$ | $3.76 \times 10^{-4}$ |

404

405 It is believed that the reflectance value of 0.314 is typical and representative of the surface  
 406 reflectance for most features on land (vegetation, sand, and soil). When the laser irradiates the  
 407 land, the noise of the single pulse echo causes a random error in the optical depth. The time  
 408 resolution of 6.25 s and resolution along track of 44 km are maintained. First, the very high  
 409 footprint is highlighted, and the very low footprint points is removed. Subsequently, the  
 410 average altitude of most of the remaining footprints is calculated. Considering this average  
 411 altitude, all the echo pulses whose footprint altitude and the average altitude are within 2 m as  
 412 a group are acquired, and the number of pulses obtained is no less than 144 pulses. Further,  
 413 they are accumulated and averaged to decrease the random measurement error of the  
 414 differential optical depth.

415 The averaging method involves first subtracting the background baseline  $B_i$  of a single  
 416 echo, normalizing, and thereafter performing the cumulative average, where

417 
$$s \geq 144, \quad \frac{N_{s,on/off}}{E_{on/off}} \approx \sum_{i=1}^M \frac{N_{i,s,on/off} - B_i}{E_{i,on/off}} \quad (31)$$

418 
$$dOD = OD_{on} - OD_{off} = -\frac{1}{2} \ln \left( \frac{N_{s,on}}{E_{on}} \right) + \frac{1}{2} \ln \left( \frac{N_{s,off}}{E_{off}} \right) \quad (32)$$

419 When the laser irradiates the plain area, it is easy to confidently pick out the footprint altitude  
 420 of more than 144 shots from 625 pulses. However, if uneven terrain is encountered, there are  
 421 less than 144 echo pulses, difference between the footprint altitude and the average altitude is  
 422 within 2 m, and average of multiple laser pulse echoes becomes unreasonable. Moreover, if  
 423 greater than 144 pulses with similar footprints are still not found, this set of data is discarded.

424 In conclusion, when laser irradiates the ocean surface, its single echo signal is relatively  
 425 weak, whereas its footprint altitude is relatively consistent; thus, more pulse echoes can be  
 426 accumulated and averaged. Further, when the laser irradiates the land surface, the altitude  
 427 consistency of the landing footprint is poor and accumulated average echo pulse is less,  
 428 although the signal-to-noise ratio of the land single echo is relatively high.  
 429

### 430 3.3.2 Uncertainty of vertical distribution profile of atmospheric temperature

431 Within a certain time resolution (distance resolution), the uncertainty of the vertical profile of  
 432 the atmospheric temperature results in an absolute systematic error with respect to the  
 433 differential optical depth (Refaat, et al., 2013).

434 When the temperature change  $\pm 1K$ , Oxygen number density is

435 
$$n_{O_2}(T \pm 1K) = \frac{0.20948p(z)}{k(T(z) \pm 1) \cdot (1 + \chi(z))} \quad (33)$$

436 
$$\Delta[dOD(0, surface)]_{\pm 1K} = \int_0^{71} n_{O_2}(T \pm 1K) \Delta\sigma(p(z), T(z) \pm 1) dz$$

$$- \int_0^{71} n_{O_2}(T) \Delta\sigma(p(z), T(z)) dz \quad (34)$$

437 **Table 5 Temperature sensitivity of differential optical depth in case of  $\pm 1K$  uncertainty**

| Regimentation | $\Delta dOD(p, T - 1) $ | $\Delta dOD(p, T + 1) $ | $Max\{\Delta dc$<br>$- 1) , \Delta d$<br>$- +1) \}$ |
|---------------|-------------------------|-------------------------|-----------------------------------------------------|
|---------------|-------------------------|-------------------------|-----------------------------------------------------|





|                       |          |          |          |
|-----------------------|----------|----------|----------|
| 764.6840/<br>764.9097 | 0.00216  | 0.00215  | 0.00216  |
| 765.1600/<br>764.9707 | 0.000929 | 0.000933 | 0.000933 |
| 765.1736/<br>765.3883 | 0.00102  | 0.00102  | 0.00102  |
| 765.6735/<br>765.4637 | 0.000139 | 0.000146 | 0.000146 |
| 759.8042/<br>759.4629 | 0.00141  | 0.00139  | 0.00141  |
| 759.8969/<br>759.4629 | 0.000173 | 0.000162 | 0.000173 |
| 760.0209/<br>759.4629 | 0.000624 | 0.000631 | 0.000631 |
| 760.1674/<br>759.4629 | 0.00170  | 0.00170  | 0.00170  |
| 760.3133/<br>759.4629 | 0.00285  | 0.00284  | 0.00285  |

438

439 **3.3.3 Error of differential optical depth  $[dOD(0, p_{surface})]_{wv}$  caused uncertainty of the**  
 440 **mixture ratio of water vapor**

441 The mixture ratio of near-ground water vapor in standard atmospheric mode is 1.247% higher  
 442 than  $\chi_{wv}(p_{surface})$ .

443 The 20% uncertainty of profile for water vapor mixture ratio introduces uncertainty in  
 444 differential optical depth  $[dOD(0, p_{surface})]_{wv}$ .

$$\Delta[dOD(p_{surface})]_{\pm 20\%wv} \approx 0.20948 \int_0^{71km} \frac{p(z)}{kT(z)(1 + (1 \pm 20\%) \chi(z))} (\sigma(\lambda_{on}, z) - \sigma(\lambda_{off}, z)) dz$$

$$445 - 0.20948 \int_0^{71km} \frac{p(z)}{kT(z)(1 + \chi(z))} (\sigma(\lambda_{on}, z) - \sigma(\lambda_{off}, z)) dz \quad (35)$$

446 **Table 6 Error differential optical depth  $[dOD(0, p_{surface})]_{wv}$  caused uncertainty of the mixture of water vapor**

| Wavelength(nm) | Differential optical depth error(20%) |
|----------------|---------------------------------------|
| 764.6840       | $5.29 \times 10^{-4}$                 |
| 764.9097       |                                       |
| 765.1600       | $4.15 \times 10^{-4}$                 |
| 764.9707       |                                       |
| 765.1736       | $4.18 \times 10^{-4}$                 |
| 765.3883       |                                       |



|     |                             |                       |
|-----|-----------------------------|-----------------------|
| 447 | $\frac{765.6735}{765.4637}$ | $2.53 \times 10^{-4}$ |
| 448 | $\frac{759.8042}{759.4629}$ | $6.71 \times 10^{-4}$ |
| 449 | $\frac{759.8969}{759.4629}$ | $4.27 \times 10^{-4}$ |
| 450 | $\frac{760.0209}{759.4629}$ | $4.71 \times 10^{-4}$ |
| 451 | $\frac{760.1674}{759.4629}$ | $6.11 \times 10^{-4}$ |
| 452 | $\frac{760.3133}{759.4629}$ | $6.88 \times 10^{-4}$ |
| 453 |                             |                       |
| 454 |                             |                       |
| 455 |                             |                       |
| 456 |                             |                       |
| 457 |                             |                       |
| 458 |                             |                       |
| 459 |                             |                       |

### 3.3.4 Error of the differential optical depth caused the difference in the altitude of the inner surface and between the land footprints.

The largest oxygen density is near the ground, and thus, differential optical depth is sensitive to high uncertainty near ground;  $\Delta H=2\text{m}$ .

$$\begin{aligned}
 \Delta[dOD(P_{surface})]_{\Delta H} &\approx \int_0^{71000} n_{O_2}(z)(\sigma(\lambda_{on}, z) - \sigma(\lambda_{off}, z))dz \\
 &\quad - \int_{\pm 2}^{71000} n_{O_2}(z)(\sigma(\lambda_{on}, z) - \sigma(\lambda_{off}, z))dz \\
 &\approx \int_0^{\pm 2} n_{O_2}(z)(\sigma(\lambda_{on}, z) - \sigma(\lambda_{off}, z))dz
 \end{aligned} \tag{36}$$

**Table 7 Differential optical depth error caused by the 2 m altitude difference**

| Wavelength | Error [dOD]             |
|------------|-------------------------|
| 764.6840   | $0.4578 \times 10^{-4}$ |
| 764.9097   |                         |
| 765.1600   | $0.3723 \times 10^{-4}$ |
| 764.9707   |                         |
| 765.1736   | $0.3737 \times 10^{-4}$ |
| 765.3883   |                         |
| 765.6735   | $0.2356 \times 10^{-4}$ |
| 765.4637   |                         |
| 759.8042   | $0.139 \times 10^{-4}$  |
| 759.4629   |                         |
| 759.8969   | $0.0905 \times 10^{-4}$ |
| 759.4629   |                         |
| 760.0209   |                         |
| 759.4629   | $0.102 \times 10^{-4}$  |



|     |          |                          |
|-----|----------|--------------------------|
| 467 | 760.1674 | 0.136 × 10 <sup>-4</sup> |
|     | 759.4629 |                          |
| 468 | 760.3133 | 0.156 × 10 <sup>-4</sup> |
| 469 | 759.4629 |                          |
| 470 |          |                          |

471 **3.3.5 Relative error in calibration for the echo and energy monitoring channels.**

472 The absolute error in the differential optical depth is  $dOD \times 0.025\%$  (Ehret, et al., 2008),  
 473 which also belongs to the systematic error.

474 **Table 8 Calibration error for echo detection channels and energy monitoring channels**  
 475

| Wavelength(nm) | $dOD(0, 71\text{km})$ | error of $dOD$           |
|----------------|-----------------------|--------------------------|
| 764.6840       | 0.428                 | 1.07 × 10 <sup>-4</sup>  |
| 764.9097       |                       |                          |
| 765.1600       | 0.325                 | 0.81 × 10 <sup>-4</sup>  |
| 764.9707       |                       |                          |
| 765.1736       | 0.328                 | 0.82 × 10 <sup>-4</sup>  |
| 765.3883       |                       |                          |
| 765.6735       | 0.192                 | 0.48 × 10 <sup>-4</sup>  |
| 765.4637       |                       |                          |
| 759.8042       | 0.493                 | 1.23 × 10 <sup>-4</sup>  |
| 759.4629       |                       |                          |
| 759.8969       | 0.321                 | 0.803 × 10 <sup>-4</sup> |
| 759.4629       |                       |                          |
| 760.0209       | 0.364                 | 0.910 × 10 <sup>-4</sup> |
| 759.4629       |                       |                          |
| 760.1674       | 0.484                 | 1.21 × 10 <sup>-4</sup>  |
| 759.4629       |                       |                          |
| 760.3133       | 0.554                 | 1.39 × 10 <sup>-4</sup>  |
| 759.4629       |                       |                          |

476

477 **3.3.6 Error in optical depth due to the wavelength dependence of aerosol scattering**

478 In the standard atmosphere mode, Mie and Rayleigh scatterings of the 765nm or 760nm dual-  
 479 wavelength are similar but not equal. The coefficient  $C$  in Eq. (10) expresses the systematic  
 480 error caused by the difference as follows:

481 
$$C = \int_0^{71\text{km}} [\alpha_a(\lambda_{on}, z) + \alpha_m(\lambda_{on}, z)] dz - \int_0^{71\text{km}} [\alpha_a(\lambda_{off}, z) + \alpha_m(\lambda_{off}, z)] dz \quad (37)$$

482 **Table 9 Optical depth error caused by the wavelength dependence of the aerosol scattering**  
 483  
 484



|     | Wavelength(nm) | C                     |
|-----|----------------|-----------------------|
| 485 | on 764.6840    | $0.90 \times 10^{-4}$ |
| 486 | off 764.9097   |                       |
| 487 | on 765.1600    | $0.76 \times 10^{-4}$ |
| 488 | off 764.9707   |                       |
| 489 | on 765.1736    | $0.86 \times 10^{-4}$ |
| 490 | off 765.3883   |                       |
| 491 | on 765.6735    | $0.84 \times 10^{-4}$ |
| 492 | off 765.4637   |                       |
| 493 | on 759.8042    | $1.39 \times 10^{-4}$ |
| 494 | off 759.4629   |                       |
| 495 | on 759.8969    | $1.77 \times 10^{-4}$ |
| 496 | off 759.4629   |                       |
| 497 | on 760.0209    | $2.28 \times 10^{-4}$ |
| 498 | off 759.4629   |                       |
| 499 | on 760.1674    | $2.88 \times 10^{-4}$ |
| 500 | off 759.4629   |                       |
| 501 | on 760.3133    | $3.47 \times 10^{-4}$ |
| 502 | off 759.4629   |                       |
| 503 | on 760.3133    | $3.47 \times 10^{-4}$ |
| 504 | off 759.4629   |                       |
| 505 | on 760.3133    | $3.47 \times 10^{-4}$ |
| 506 | off 759.4629   |                       |

507 The errors in aerosol Mie scattering with the wavelength dependence error, spectral width  
 508 error, and spectral purity error, can be eliminated by correction. Wavelength dependence of  
 509 extinction coefficient of aerosol,  $0.0 < k < 2.0$ ,  $k$  is uncertain and varies with the particle size,  
 510 shape and concentration of aerosol, so it will bring systematic error of differential optical  
 511 depth.  
 512

### 513 3.3.7 Error in differential optical depth from the spectral purity of the on/off laser

514 The spectral purity  $\zeta$  of the spaceborne IPDA LIDAR is 99.99% (Wulfmeyer and ösenberg et  
 515 al.1996), which results in an increase in the on-channel echo and the absolute error of the  
 516 optical depth. For a spectral purity of 100%, the relationship between the two on/off channel  
 517 signals is considered to be  $N_{s,on}' = N_{s,off}' e^{-2dOD}$  and  $dOD = -\frac{1}{2} \ln \left( \frac{N_{s,on}'}{N_{s,off}'} \right)$ . However,  
 518 because the spectral purity is not 100%, but it only is  $\zeta$ , the relationship between the two  
 519 channel signals is approximately  $N_{s,on} = N_{s,off} [(1 - \zeta) + \zeta e^{-2dOD}]$ ,  $\ln \left( \frac{N_{s,on}}{N_{s,off}} \right) =$   
 520  $\ln[(1 - \zeta) + \zeta e^{-2dOD}]$ , and the spectral purity yield the following error in optical depth:

$$\begin{aligned}
 \varepsilon_{\xi} &= \frac{1}{2} \ln \left( \frac{N_{s,on}}{N_{s,off}} \right) - \frac{1}{2} \ln \left( \frac{N_{s,on}'}{N_{s,off}'} \right) \\
 521 \quad &\approx dOD + \frac{1}{2} \ln[1 - \zeta(1 - e^{-2dOD})] \quad (38)
 \end{aligned}$$



522

**Table 10 Error in differential optical depth from spectral purity of 99.99%**

| Wavelength | $dOD(0, 71\text{km})$ | Error (spectral purity of 99.99%) |
|------------|-----------------------|-----------------------------------|
| 764.6840   | 0.428                 | $6.79 \times 10^{-5}$             |
| 764.9097   |                       |                                   |
| 765.1600   | 0.325                 | $4.60 \times 10^{-5}$             |
| 764.9707   |                       |                                   |
| 765.1736   | 0.328                 | $4.66 \times 10^{-5}$             |
| 765.3883   |                       |                                   |
| 765.6735   | 0.192                 | $2.36 \times 10^{-5}$             |
| 765.4637   |                       |                                   |
| 759.8042   | 0.493                 | $8.40 \times 10^{-5}$             |
| 759.4629   |                       |                                   |
| 759.8969   | 0.322                 | $4.51 \times 10^{-5}$             |
| 759.4629   |                       |                                   |
| 760.0209   | 0.364                 | $5.35 \times 10^{-5}$             |
| 759.4629   |                       |                                   |
| 760.1674   | 0.484                 | $8.16 \times 10^{-5}$             |
| 759.4629   |                       |                                   |
| 760.3133   | 0.554                 | $1.01 \times 10^{-4}$             |
| 759.4629   |                       |                                   |

523

### 524 3.3.8 Error of differential optical depth caused jitter of $\nu$ in central optical frequency

525 The laser source of the spaceborne IPDA has a jitter of  $\nu$  central optical frequency, whereas  
 526 the online/offline emission laser spectrum has a central frequency jitter of 10MHz(Strotkamp  
 527 et al., 2019).  $\Delta\nu_{on} = \pm 10\text{MHz}$  introduces uncertainty in the Oxygen molecule absorption cross-  
 528 section  $\sigma(\nu_{on})$ , resulting in a systematic error in the optical depth. However, for solid-state  
 529 lasers, stabilizing the center wavelength within  $\pm 10\text{MHz}$  is quite easy compared to within  
 530  $\pm 1\text{MHz}$ . For example, if the center wavelength is offset by  $\pm 10\text{MHz}$ , the jitter of the emitted  
 531 laser frequency that affects the swing of the optical depth can be expressed as

532

$$\begin{aligned}
 [dOD(0, surface)]_{10\text{MHz}} &= \int_0^{71\text{km}} \frac{0.20948p(z)}{kT(z)(1+\chi(z))} (\sigma(\nu_{on} \pm 10\text{MHz}, z) - \sigma(\nu_{off}, z)) dz \\
 &- \int_0^{71\text{km}} \frac{0.20948p(z)}{kT(z)(1+\chi(z))} (\sigma(\nu_{on}, z) - \sigma(\nu_{off}, z)) dz \quad (39)
 \end{aligned}$$

534 It is evident from the curves of the two bands in Fig.5 that because the former is next to an  
 535 absorption line  $13069.062119\text{cm}^{-1}$  of the oxygen isotope  $^{16}\text{O}^{18}\text{O}$ , the curvature at the former  
 536 position protrudes, and the abscissa of the curve is the laser frequency (Wavelength).

537 **Table 11 Jitter in the emission laser frequency  $\nu$  causes a 10MHz change in the differential optical depth**



538

539

540

| $\lambda(\text{nm})$ | $dOD(v \pm 10\text{MHz}, p) - dOD(v, p)$ |                           | $\text{Max}\{ \Delta(+10\text{MHz}) ,  \Delta(-10\text{MHz}) \}$ |
|----------------------|------------------------------------------|---------------------------|------------------------------------------------------------------|
|                      | $ \Delta(+10\text{MHz}) $                | $ \Delta(-10\text{MHz}) $ |                                                                  |
| 764.6840             | $6.18 \times 10^{-7}$                    | $9.62 \times 10^{-7}$     | $9.62 \times 10^{-7}$                                            |
| 764.9097             |                                          |                           |                                                                  |
| 765.1600             | $2.23 \times 10^{-5}$                    | $2.38 \times 10^{-5}$     | $2.38 \times 10^{-5}$                                            |
| 764.9707             |                                          |                           |                                                                  |
| 765.1736             | $2.00 \times 10^{-6}$                    | $2.81 \times 10^{-6}$     | $2.81 \times 10^{-6}$                                            |
| 765.3883             |                                          |                           |                                                                  |
| 765.6735             | $1.04 \times 10^{-6}$                    | $8.53 \times 10^{-7}$     | $1.04 \times 10^{-6}$                                            |
| 765.4637             |                                          |                           |                                                                  |
| 759.8042             | $4.28 \times 10^{-3}$                    | $2.52 \times 10^{-3}$     | $4.28 \times 10^{-3}$                                            |
| 759.4629             |                                          |                           |                                                                  |
| 759.8969             | $1.56 \times 10^{-3}$                    | $1.19 \times 10^{-3}$     | $1.56 \times 10^{-3}$                                            |
| 759.4629             |                                          |                           |                                                                  |
| 760.0209             | $7.71 \times 10^{-4}$                    | $7.76 \times 10^{-4}$     | $7.76 \times 10^{-4}$                                            |
| 759.4629             |                                          |                           |                                                                  |
| 760.1674             | $6.84 \times 10^{-4}$                    | $1.60 \times 10^{-3}$     | $1.60 \times 10^{-4}$                                            |
| 759.4629             |                                          |                           |                                                                  |
| 760.3133             | $3.83 \times 10^{-4}$                    | $9.49 \times 10^{-4}$     | $9.49 \times 10^{-4}$                                            |
| 759.4629             |                                          |                           |                                                                  |

541 According to the comprehensive analysis of the above differential optical depth errors  
 542 induced in many factors, the comprehensive evaluation index items of the wavelength to be  
 543 selected are shown in Figure 12 and Figure 13.  
 544

545

**Table 12 Comprehensive of various errors at near 765nm**

| Wavelength                         |       | 764.6840               | 765.1600               | 765.1736               | 765.6735               |
|------------------------------------|-------|------------------------|------------------------|------------------------|------------------------|
|                                    |       | /764.9097              | /764.9707              | /765.3883              | /765.4637              |
| Random error                       | ocean | $2.44 \times 10^{-4}$  | $2.24 \times 10^{-4}$  | $2.20 \times 10^{-4}$  | $2.00 \times 10^{-4}$  |
|                                    | land  | $3.55 \times 10^{-4}$  | $3.30 \times 10^{-4}$  | $3.24 \times 10^{-4}$  | $2.96 \times 10^{-4}$  |
| Temperature                        | 1K    | $21.54 \times 10^{-4}$ | $9.31 \times 10^{-4}$  | $10.16 \times 10^{-4}$ | $1.43 \times 10^{-4}$  |
| Vapor mixing ratio                 | 20%   | $5.29 \times 10^{-4}$  | $4.15 \times 10^{-4}$  | $4.18 \times 10^{-4}$  | $2.53 \times 10^{-4}$  |
| Energy monitor channel calibration |       | $1.07 \times 10^{-4}$  | $0.813 \times 10^{-4}$ | $0.820 \times 10^{-4}$ | $0.480 \times 10^{-4}$ |
| Echo channel calibration           |       | $1.07 \times 10^{-4}$  | $0.813 \times 10^{-4}$ | $0.820 \times 10^{-4}$ | $0.480 \times 10^{-4}$ |



|                                                 |                        |                        |                        |                        |
|-------------------------------------------------|------------------------|------------------------|------------------------|------------------------|
| Elevation 2m error                              | $0.458 \times 10^{-4}$ | $0.372 \times 10^{-4}$ | $0.374 \times 10^{-4}$ | $0.236 \times 10^{-4}$ |
| Aerosol Mie scattering                          | $0.903 \times 10^{-4}$ | $0.756 \times 10^{-4}$ | $0.857 \times 10^{-4}$ | $0.837 \times 10^{-4}$ |
| 99.99% spectral purity                          | $0.679 \times 10^{-4}$ | $0.460 \times 10^{-4}$ | $0.466 \times 10^{-4}$ | $0.236 \times 10^{-4}$ |
| Frequency jitter(10MHZ)                         | $9.62 \times 10^{-7}$  | $0.238 \times 10^{-4}$ | $2.81 \times 10^{-6}$  | $1.04 \times 10^{-6}$  |
| Differential absorption cross section ( $m^2$ ) | $1.80 \times 10^{-29}$ | $1.46 \times 10^{-29}$ | $1.47 \times 10^{-29}$ | $9.25 \times 10^{-30}$ |
| Geometrically added                             | $25.8 \times 10^{-4}$  | $19.6 \times 10^{-4}$  | $14.3 \times 10^{-4}$  | $6.08 \times 10^{-4}$  |
| Absolute error(hPa)                             | 3.29                   | 3.08                   | 2.23                   | 1.51                   |
| Relative error(%)                               | 0.324                  | 0.304                  | 0.220                  | 0.150                  |

546

547

**Table 13 Comprehensive of various errors at near 760nm**

| Wavelength                                      |       | 759.8042<br>/759.4629  | 759.8969<br>/759.4629  | 760.0209<br>/759.4629  | 760.1674<br>/759.4629  | 760.3133<br>/759.4629  |
|-------------------------------------------------|-------|------------------------|------------------------|------------------------|------------------------|------------------------|
| Random error                                    | ocean | $2.59 \times 10^{-4}$  | $2.09 \times 10^{-4}$  | $2.22 \times 10^{-4}$  | $2.64 \times 10^{-4}$  | $2.96 \times 10^{-4}$  |
|                                                 | land  | $3.78 \times 10^{-4}$  | $3.06 \times 10^{-4}$  | $3.25 \times 10^{-4}$  | $3.84 \times 10^{-4}$  | $4.29 \times 10^{-4}$  |
| Temperature                                     | 1K    | $26.2 \times 10^{-4}$  | $4.64 \times 10^{-4}$  | $9.10 \times 10^{-4}$  | $27.5 \times 10^{-4}$  | $47.8 \times 10^{-4}$  |
| Vapor mixing ratio                              | 20%   | $7.68 \times 10^{-4}$  | $4.86 \times 10^{-4}$  | $5.38 \times 10^{-4}$  | $7.03 \times 10^{-4}$  | $7.95 \times 10^{-4}$  |
| Energy monitor channel calibration              |       | $1.91 \times 10^{-4}$  | $1.25 \times 10^{-4}$  | $1.40 \times 10^{-4}$  | $1.96 \times 10^{-4}$  | $2.28 \times 10^{-4}$  |
| Echo channel calibration                        |       | $1.91 \times 10^{-4}$  | $1.25 \times 10^{-4}$  | $1.40 \times 10^{-4}$  | $1.96 \times 10^{-4}$  | $2.28 \times 10^{-4}$  |
| Elevation 2m error                              |       | $0.22 \times 10^{-4}$  | $0.14 \times 10^{-4}$  | $0.16 \times 10^{-4}$  | $0.22 \times 10^{-4}$  | $0.26 \times 10^{-4}$  |
| Aerosol Mie scattering                          |       | $1.21 \times 10^{-4}$  | $1.59 \times 10^{-4}$  | $2.09 \times 10^{-4}$  | $2.69 \times 10^{-4}$  | $3.29 \times 10^{-4}$  |
| 99.99% spectral purity                          |       | $0.840 \times 10^{-4}$ | $0.451 \times 10^{-4}$ | $0.535 \times 10^{-4}$ | $0.816 \times 10^{-4}$ | $1.01 \times 10^{-4}$  |
| Frequency jitter(10MHZ)                         |       | $42.8 \times 10^{-4}$  | $15.6 \times 10^{-4}$  | $7.76 \times 10^{-4}$  | $16.0 \times 10^{-4}$  | $9.49 \times 10^{-4}$  |
| Differential absorption cross section ( $m^2$ ) |       | $2.45 \times 10^{-29}$ | $1.51 \times 10^{-29}$ | $1.63 \times 10^{-29}$ | $2.08 \times 10^{-29}$ | $2.32 \times 10^{-29}$ |
| Geometrically added                             |       | $54.6 \times 10^{-4}$  | $20.2 \times 10^{-4}$  | $16.7 \times 10^{-4}$  | $36.7 \times 10^{-4}$  | $53.9 \times 10^{-4}$  |
| Absolute error(hPa)                             |       | 5.12                   | 3.07                   | 2.35                   | 4.05                   | 5.34                   |
| Relative error(%)                               |       | 0.505                  | 0.302                  | 0.232                  | 0.400                  | 0.527                  |

548

549 Consequently, according to Table 12 and Table 13, the pulse energy, pulse repetition, time  
 550 resolution, and distance along track are 100mJ, 100Hz, 6.25 s, and 44km, respectively. The  
 551 765.6735/765.4637 wavelength pairs are used as detection wavelength and reference  
 552 wavelength. In the 1K error temperature profile, 20% error vapor mixing ratio result in  $6.08 \times$   
 553  $10^{-4}$  error in differential optical depth, which corresponds to an absolute error in surface  
 554 pressure of 1.51hPa, therefore, it is a desirable result that the relative error of surface pressure  
 555 could be considered as 0.150%.



556 **4 Summary**

557 The calculation process of retrieving the surface pressure from the atmospheric differential  
558 optical depth was also discussed. The performance of the differential absorption LIDAR  
559 model was evaluated. Owing to the influence of temperature on Oxygen absorption  
560 coefficient and the uncertainty of atmospheric mixing ratio, maintaining the relative error of  
561 surface atmospheric pressure below 0.1% is a challenging task. The main factors affecting the  
562 random error of surface pressure are the low sea reflectivity, random error of low signal-to-  
563 noise ratio, and the uneven ground, which renders the multi pulse echo unable to be  
564 accumulated and averaged directly. Further, 765.6735/765.4637nm was selected as the  
565 working wavelength, the pulse energy, pulse repetition, time resolution, distance along the  
566 track resolution are 100mJ, 100Hz, 6.25 s, and 44km, respectively, while the relative error of  
567 surface atmospheric pressure was controlled in the range of 0.2–0.3%.

568

569 **Author contribution**

570 Guanglei Hong developed the model and Yu Dong performed the simulations, was  
571 responsible for data processing and software code. Guanglei Hong provided part of the  
572 manuscript and analyzed the method respectively. Huige Di supervised and modified the  
573 manuscript.

574

575 **Competing interests**

576 I declare that there is no conflict of interest.

577

577 **References**

578

579 Brown, R. A. and Levy, G.: Ocean surface pressure fields from satellite-sensed winds, *Mon.*  
580 *Wea. Rev.*114, doi.org/10.1175/1520-0493, 1986.

581 Korb, C. L., Schwemmer, G. K., Famiglietti, J., Walden, H. and Prasad, C.: Differential  
582 Absorption LIDARS for Remote Sensing of Atmospheric Pressure and Temperature Profiles:  
583 Final Report, NASA Tech. Memo. 104618, 1995.

584 Korb, C. L. and Weng, C. Y.: Differential absorption LIDAR technique for measurement of  
585 the atmospheric pressure profile, *Appl.Opt.*22(23), 3759-3770, doi:10.1364/AO.22.003759,  
586 1983.

587 Schwemmer, G. K., Dombrowski, M., Korb, C. L. Milrod, J., Walden, H. and Kagann, R. H.:  
588 A LIDAR system for measuring atmospheric pressure and temperature profiles, *Rev. Sci.*  
589 *Instrum.*58(12), 2226~2237, doi:10.1063/1.1139327, 1987.

590 Korb, C. L., Schwemmer, G. K., Dombrowski, M. and Weng, C. Y.: Airborne and ground  
591 based LIDAR measurements of the atmospheric pressure profile, *Appl.Opt.*28(15),  
592 3015~3020, doi:10.1364/AO.28.003015, 1989.

593 Flamant, C. N., Schwemmer, G. K., Korb, C. L., Evans, K. D. and Palm, S. P.: Pressure  
594 Measurements using and Airborne Differential Absorption LIDAR. Part I: Analysis of the  
595 Systematic Error Sources, *J. Atmos. and Ocean. Technol.*16,561~574,  
596 doi:http://dx.doi.org/10.1175/1520-0426(1999)0162.0.CO;2, 1999.





- 597 Zaccheo, T. S., Pernini, T., Snell, H. E. and Browell, E. V.: Impact of atmospheric state  
598 uncertainties on retrieved XCO<sub>2</sub> columns from laser differential absorption spectroscopy  
599 measurements, *Journal of Applied remote sensing*, 083575, doi:10.1117/1.jrs.8.083575, 2014.  
600 Crowell, S., Rayner, P., Zaccheo, S. and Moore, B.: Impacts of atmospheric state uncertainty  
601 on O<sub>2</sub> measurement requirements for the ASCENDS mission, *Atmos. Meas. Tech.*, 8, 2685-  
602 2697, doi:10.5194/amt-8-2685-2015, 2015.
- 603 Stephen, M. A., Krainak, M., Riris, H. and Allan, G. R.: Narrowband, tunable, frequency-  
604 doubled, erbium-doped fiber-amplified transmitter, *Opt. Lett.*, 32, 2073-2075,  
605 doi:10.1364/OL.32.002073, 2007.
- 606 Stephen, M. A., Mao, J. P., Abshire, J. B., Sun, X., Kawa, S. R. and Krainak, M. A.: Oxygen  
607 Spectroscopy Laser Sounding Instrument for Remote Sensing of Atmospheric Pressure, *OSA*,  
608 doi:10.1109/aero.2008.4526388, 2008.
- 609 Riris, H., Rodriguez, M., Allan, G. R., Hasselbrack, W. E., Stephen, M. A. and Abshire, J. B.:  
610 Airborne LIDAR measurements of atmospheric pressure made using the oxygen A-band,  
611 Lasers, Sources, and Related Photonic Devices Technical Digest, *OSA*,  
612 doi:10.1117/12.892021, 2012.
- 613 Riris, H., Rodriguez, M., Allan, G. R., Hasselbrack, W. E., Mao, J. P., Stephen, M. A. and  
614 Abshire, J.: Pulsed airborne LIDAR measurements of atmospheric optical depth using the  
615 Oxygen A-band at 765 nm, *Appl. Opt.*, 52(25), 6369-6382, doi:10.1364/ao.52.006369, 2013.
- 616 Riris, H., Rodriguez, M., Mao, J. P., Allan, G. and Abshire, J.: Airborne demonstration of  
617 atmospheric oxygen optical depth measurements with an integrated path differential  
618 absorption LIDAR, *Opt. Express*, 25(23) 29307~29327, doi:10.1364/oe.25.029307, 2017.
- 619 Millán, L., Lebsack, M., Livesey, N., Tanelli, S. and Stephens, G.: Differential absorption  
620 radar techniques: surface pressure, *Atmos. Meas. Tech.*, 7, 3959-3970, doi:10.5194/amt-7-  
621 3959-2014, 2014.
- 622 Brown, L. R. and Plymate, C.: Experimental Line Parameters of the Oxygen A Band at 760  
623 nm, *J. Mol. Spectrosc.*, 199, 166-179, doi:10.1006/jmsp.1999.8012, 2000.
- 624 Munk, A., Jungbluth, B., Strotkamp, M., Hoffmann, H.-D., Poprawe, R., Höffner, J. and  
625 Lübken, F.-J.: Diode-pumped alexandrite ring laser in single-longitudinal mode operation for  
626 atmospheric LIDAR measurements, *Opt. Express*, 26(12), 14928-14935, doi:  
627 10.1364/oe.26.014928, 2018.
- 628 Munk, A., Strotkamp, M., Walochnik, M., Jungbluth, B., Traub, M., Hoffmann, H. -D.,  
629 Poprawe, R., Höffner, J. and Lübken, F.-J.: Diode-pumped Q-switched Alexandrite laser in  
630 single longitudinal mode operation with Watt-level output power, *Opt. Lett.*, 43(22), 5492-  
631 5495, doi:10.1364/OL.43.005492, 2018.



- 632 Coney, A. T. and Damzen, M. J.: High-energy diode-pumped alexandrite amplifier  
633 development with applications in satellite-based LIDAR, *Journal of the Optical Society of*  
634 *America B38(1)*, 209-219, doi:10.1364/JOSAB.409921, 2021.
- 635 Strotkamp, M., Munk, A., Jungbluth, B., Hoffmann, H. D. and Hoffner, J.: Diode pumped  
636 Alexandrite laser for next generation satellite based earth observation LIDAR, *CEAS Space*  
637 *J.11*, 413-422, doi:10.1007/s12567-019-00253-z, 2019.
- 638 Munk, A., Jungbluth, B., Strotkamp, M., Hoffmann, H.-D., Poprawe, R. and Höffner, J.:  
639 Alexandrite laser in Q-switched, single longitudinal mode operation pumped by a fiber-  
640 coupled diode module, *Proc. SPIE 10896*, 1089610, doi:10.1117/12.2508402, 2019.
- 641 Munk, A., Jungbluth, B., Strotkamp, M., Hoffmann, H.-D., Poprawe, R. and Höffner, J.:  
642 Diode-pumped Alexandrite ring laser for LIDAR applications,” *Proc. SPIE 9726*, 972601,  
643 doi:10.1117/12.2212578, 2016.
- 644 Thomas, G. M., Minassian, A., Sheng, X. and Damzen, M. J.: Diode-pumped Alexandrite  
645 lasers in Q-switched and cavity-dumped Q-switched operation, *Opt. Express* 24(24), 27212–  
646 27224, doi:10.1364/OE.24.027212, 2016.
- 647 Wulfmeyer, V. and ösenberg, J. B.: Single-mode operation of an injection-seeded alexandrite  
648 ring laser for application in water-vapor and temperature differential absorption LIDAR, *Opt.*  
649 *Lett.* 21(15), 1150-1152, doi:10.1364/OL.21.001150, 1996.
- 650 Lemmerz, C., Lux, O., Reitebuch, O., Witschas, B. and Wührer, C.: Frequency and timing  
651 stability of an airborne injection-seeded Nd:YAG laser system for direct-detection wind  
652 LIDAR, *Appl. Opt.* 56(32), 9057-9068, doi:10.1364/AO.56.009057, 2017.
- 653 Lancaster, R. S., Spinhirne, J. D. and Palm, S. P.: Laser pulse reflectance of the ocean surface  
654 from the GLA satellite LIDAR, *Geophys. Res. Lett.* 32, L22S10, doi:10.1029/2005GL023732,  
655 2015.
- 656 Bufton, J. L., Hoge, F. E. and Swift, R. N.: Airborne measurements of laser backscatter from  
657 the ocean surface, *Appl. Opt.* 22(17), 2603-2618, doi:10.1364/AO.22.002603, 1983.
- 658 Menzies, R. T., Tratt, D. M. and Hunt, W. H.: LIDAR In-space Technology Experiment  
659 measurements of sea surface directional reflectance and the link to surface wind speed, *Appl.*  
660 *Opt.* 37(24), 5550-5559, doi:10.1364/AO.37.005550, 1998.
- 661 Ehret, G., Kiemle, C., Wirth, M., Amediek, A., Fix, A. and Houweling, S.: Space-borne  
662 remote sensing of CO<sub>2</sub>, CH<sub>4</sub>, and N<sub>2</sub>O by integrated path differential absorption LIDAR: a  
663 sensitivity analysis, *Appl. Phys. B* 90, 593–608, doi:10.1007/s00340-007-2892-3, 2008.
- 664 Standard solar constant and zero air mass solar spectral irradiance tables, ASTM international,  
665 100 Brr Harbor Drive, United States, 2000.



- 666 Refaat, T. F., Ismail, S., Nehrir, A. R., Hair, J.W., Crawford, J. H., Leifer, I. and Shuman, T.:  
667 Performance evaluation of a 1.6- $\mu\text{m}$  methane DIAL system from ground, aircraft and UAV  
668 platforms, *Opt. Express*21(25), 30415-30432, doi:10.1364/OE.21.030415, 2013.
